# Supplementary material for: Multi-centennial evolution of the climate response and deep-ocean heat uptake in a set of abrupt stabilization scenarios with EC-Earth3
Source: Copernicus journal article supplement (doi:10.5194/esd-15-527-2024), 2024-04-30
Supplement: Supplementary file 1 [file esd-15-527-2024-supplement.pdf]

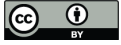

*Supplement of*

## **Multi-centennial evolution of the climate response and deep-ocean heat uptake in a set of abrupt stabilization scenarios with EC-Earth3**

**Federico Fabiano et al.**

*Correspondence to:* Federico Fabiano (f.fabiano@isac.cnr.it)

The copyright of individual parts of the supplement might differ from the article licence.

Multi-centennial evolution of the climate response and deep ocean heat uptake in a set of abrupt stabilization scenarios with EC-Earth3 -  
Supplementary material

February 28, 2024

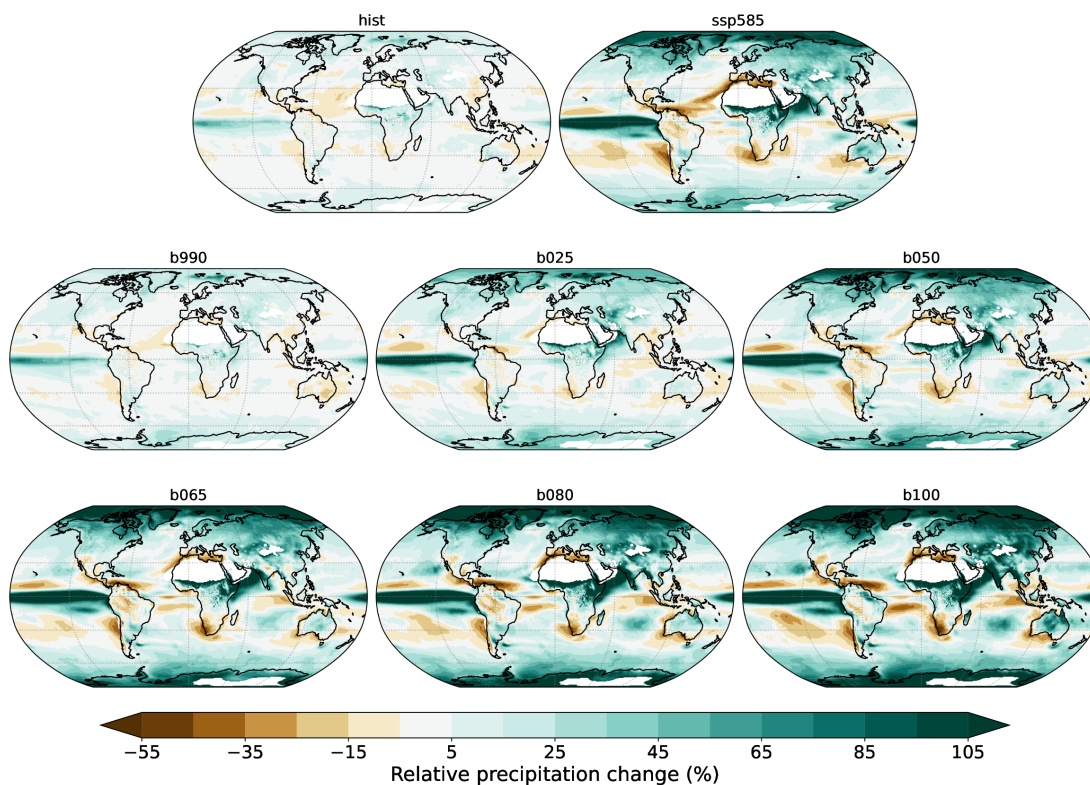

**Figure S1.** Precipitation change relative to pre-industrial at the end of the simulations.

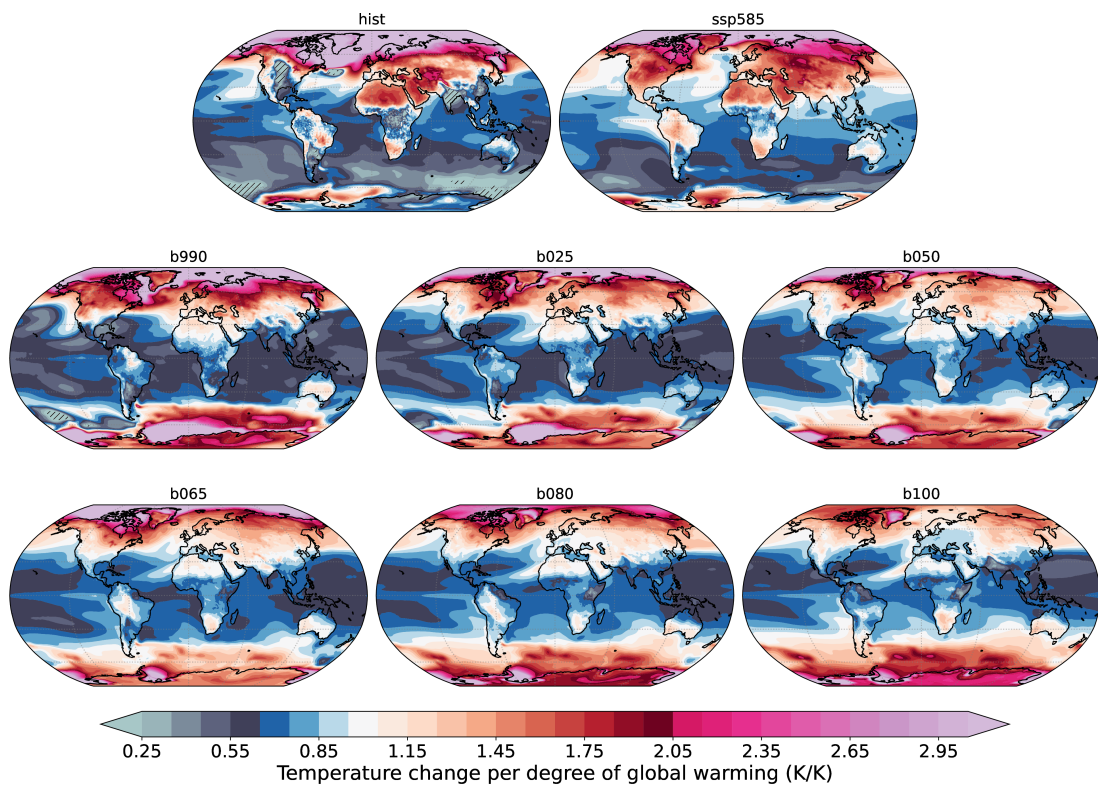

**Figure S2.** Temperature change per degree of global warming during the course of the simulation.

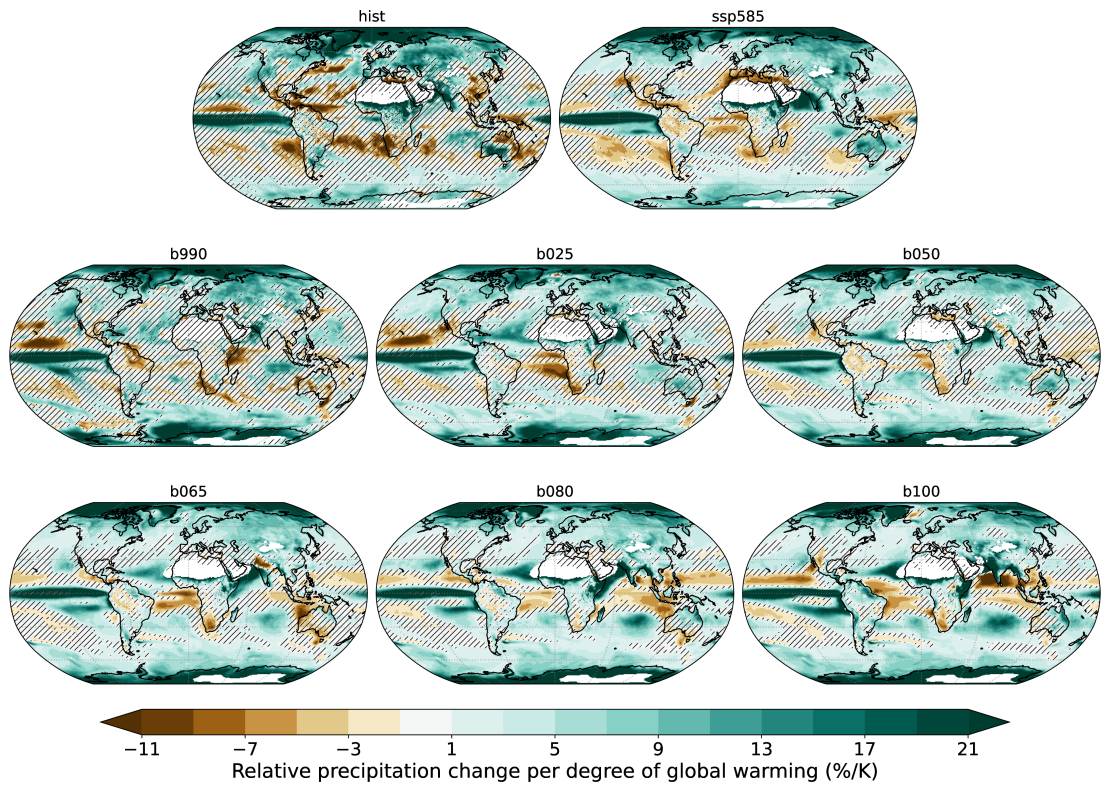

**Figure S3.** Relative precipitation change per degree of global warming during the course of the simulation.

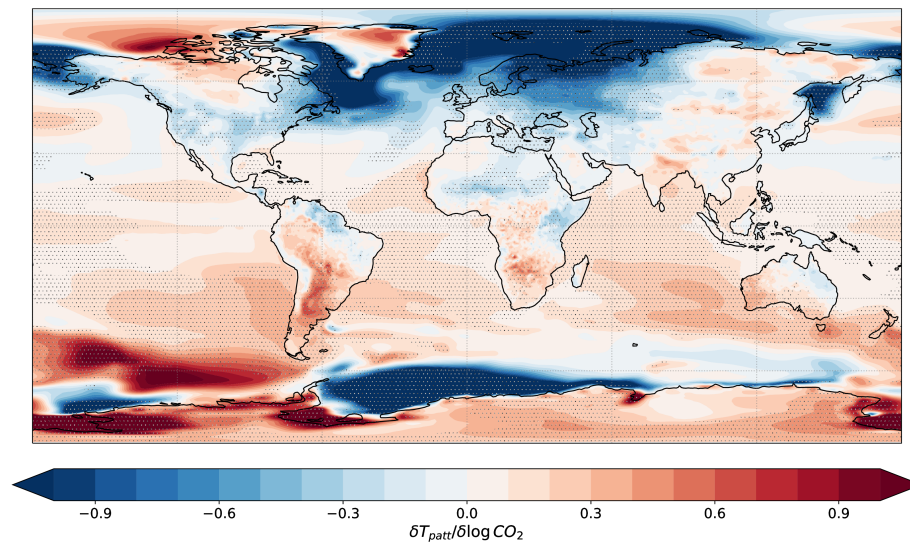

**Figure S4.** Dependence of the warming pattern on the forcing level. The map shows the regression of each simulation's warming pattern with respect to the logarithm of the  $CO_2$  concentration, which we assume close to the effective external forcing. Dots indicate regions with a significant regression.

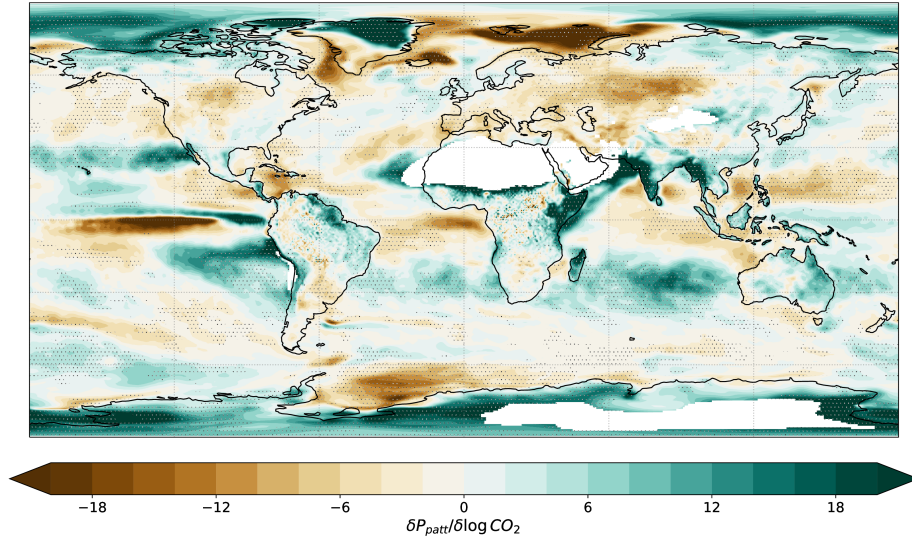

**Figure S5.** As before, but for the pattern of relative precipitation change.

**Table S1.** As in Table 4, but showing the relative amount of additional heat stored in each layer at the end of the runs.

| Layer            | b990 | b025 | b050 | b065 | b080 | b100 |
|------------------|------|------|------|------|------|------|
| Upper (< 700 m)  | 18%  | 24%  | 29%  | 32%  | 35%  | 39%  |
| Mid (700-2000 m) | 27%  | 32%  | 37%  | 40%  | 41%  | 41%  |
| Deep (> 2000 m)  | 55%  | 44%  | 35%  | 28%  | 24%  | 20%  |

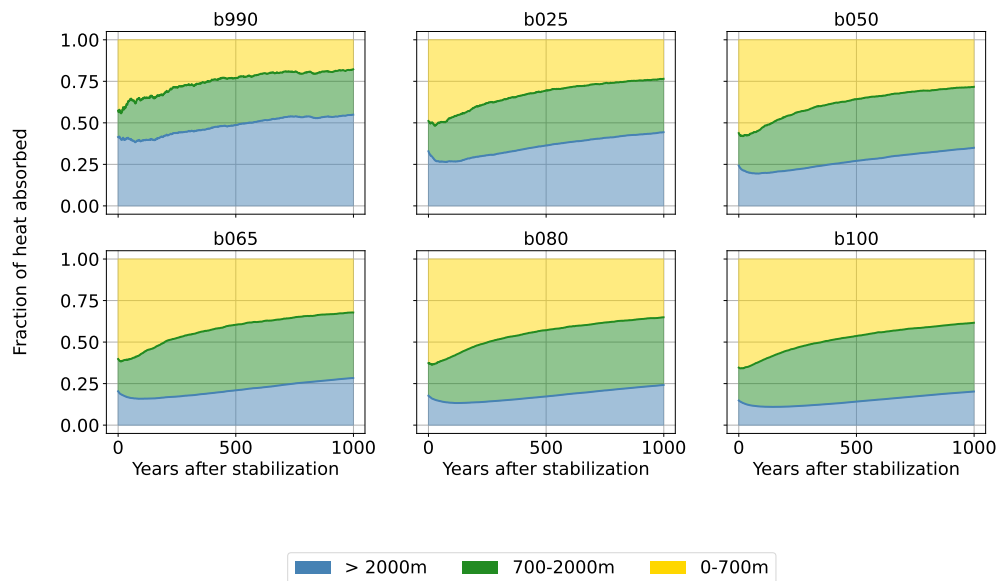

**Figure S6.** Relative distribution of heat in three depth regions of the global ocean: 0-700m, 700-2000m and below 2000m.

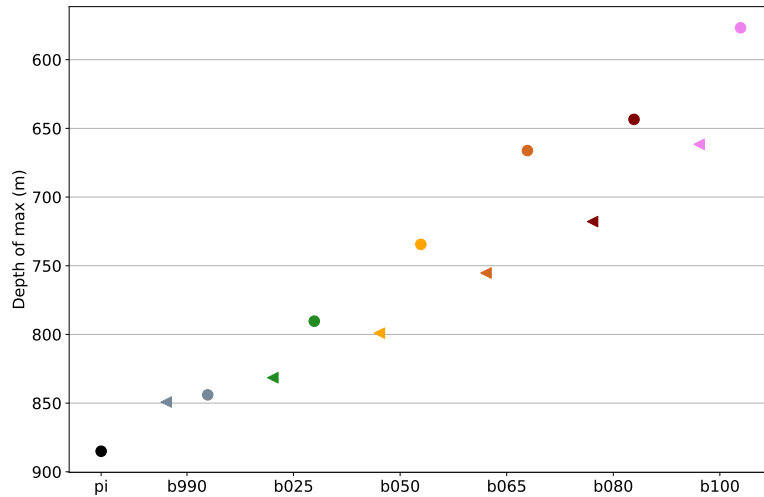

**Figure S7.** Depth of the absolute maximum of the AMOC at the beginning (dots) and at the end of the simulations (triangles).

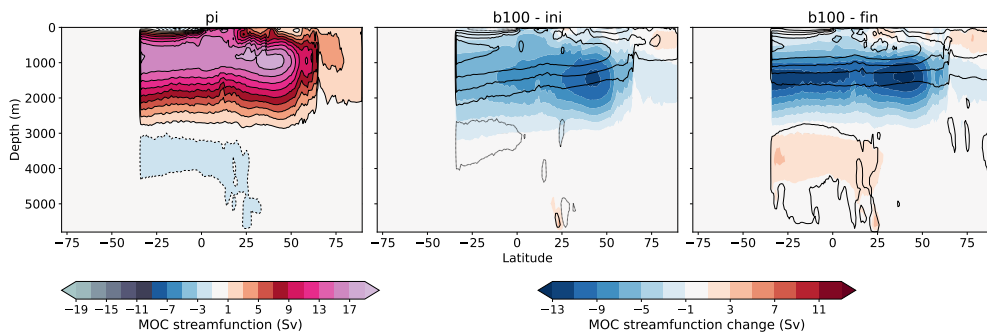

**Figure S8.** MOC streamfunction (Sv) of the Atlantic ocean for the average pre-industrial (shading, left panel), and the initial and final states of the b100 simulation (mid and right panel; shading: difference to PI, contour: full field at steps of 3 Sv)

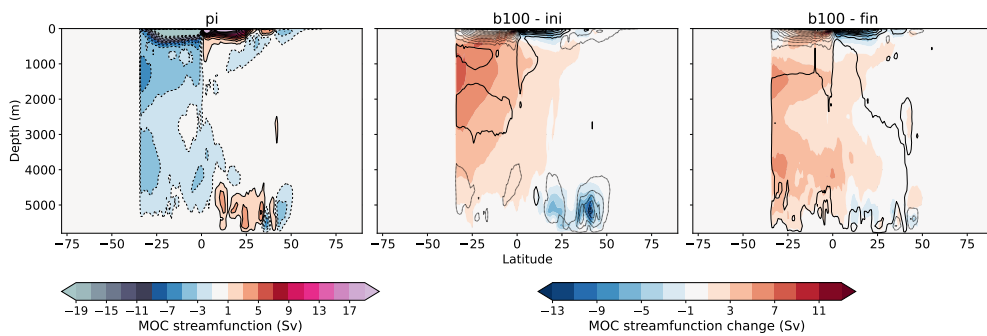

**Figure S9.** MOC streamfunction (Sv) of the Pacific/Indian oceans for the average pre-industrial (shading, left panel), and the initial and final states of the b100 simulation (mid and right panel; shading: difference to PI, contour: full field at steps of 3 Sv)
